# Supplementary material for: Anticoagulant effects of rivaroxaban, prednisone, alone and in combination, in healthy dogs
Source: PubMed Central journal article supplement (PMC9708426; doi:10.1111/jvim.16572), 2022-11-18

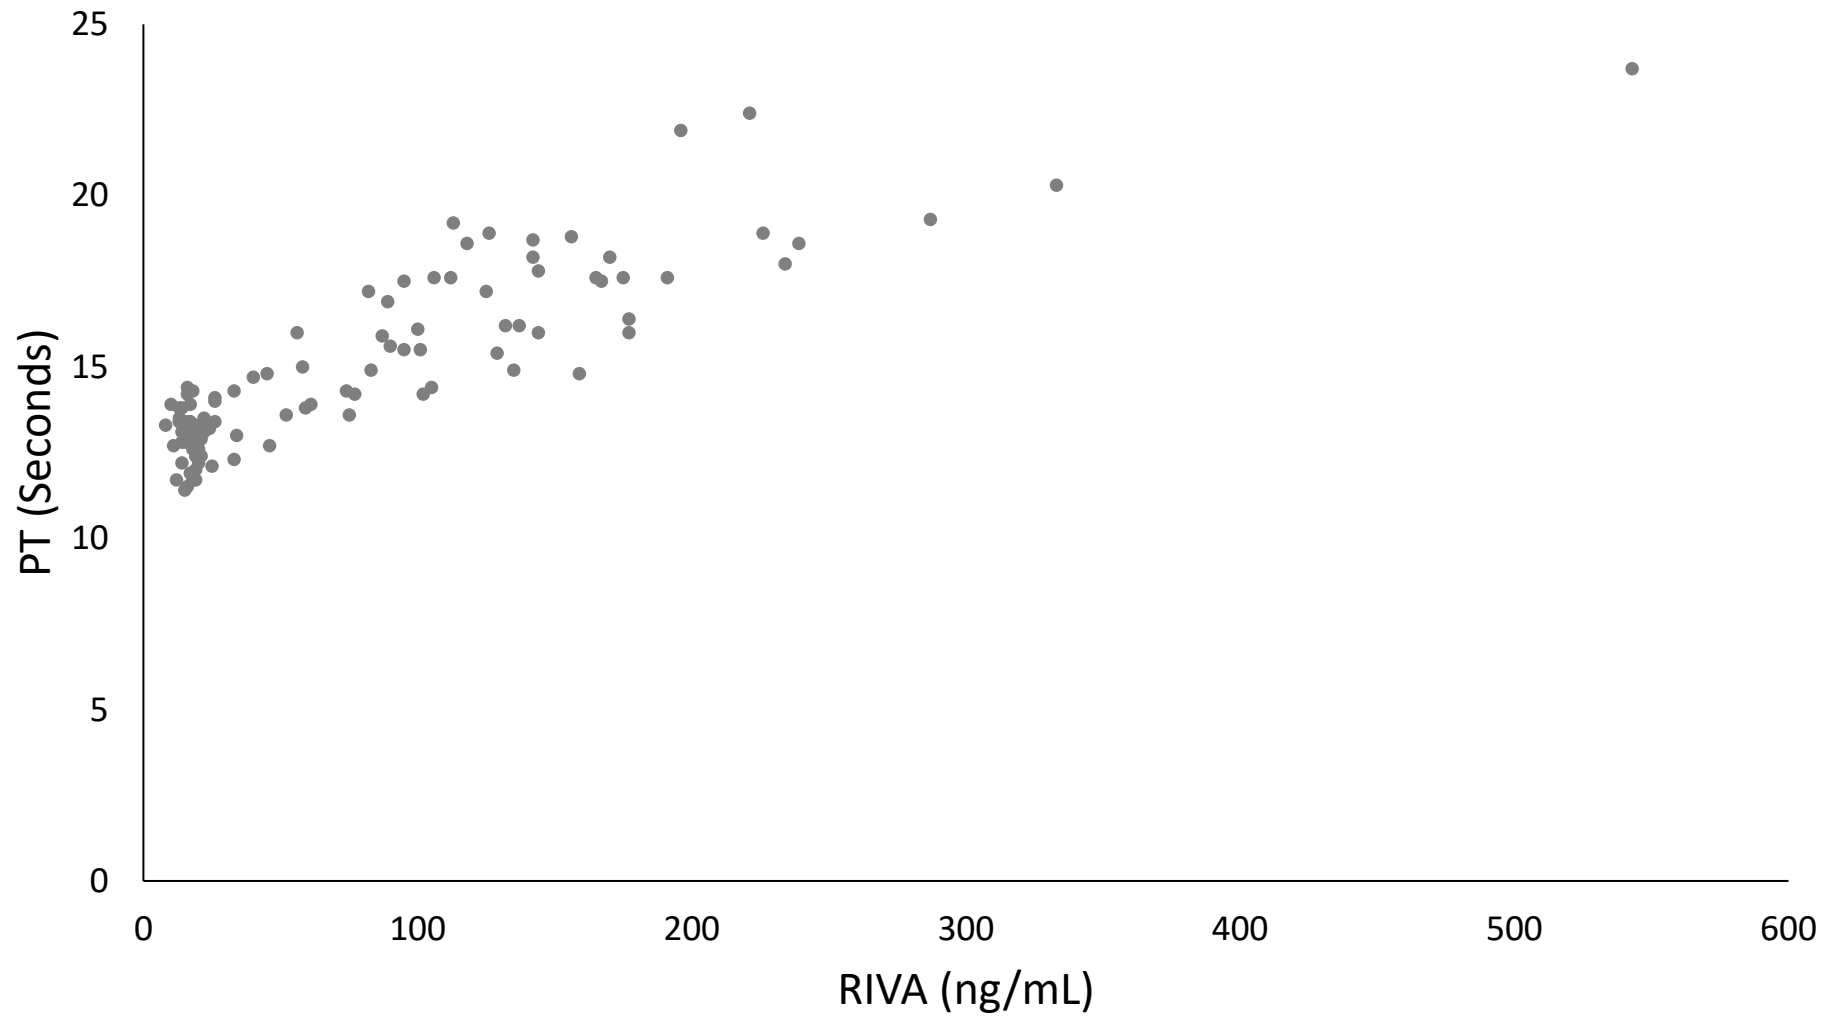

Supplement: JVIM-36-2009-s001.pdf [file JVIM-36-2009-s001.pdf]
